# Supplementary material for: Dual-Mode Graphene Field-Effect Transistor Biosensor with Isothermal Nucleic Acid Amplification
Source: MDPI journal article supplement (doi:10.3390/bios14020091), 2024-02-08
Supplement: s1 [file s1]

# Supplementary Information

## Dual-Mode Graphene Field-Effect Transistor Biosensor with Isothermal Nucleic Acid Amplification

Hyo Eun Kim <sup>1</sup>, Ariadna Schuck <sup>1</sup>, Hyeonseek Park <sup>2,3</sup>, Doo Ryeon Chung <sup>4,5</sup>, Minhee Kang <sup>2,\*</sup>, Yong-Sang Kim <sup>1,\*</sup>

<sup>1</sup> Department of Electrical and Computer Engineering, Sungkyunkwan University, Suwon, 16419 Republic of Korea; hyoeun0707@naver.com (H.E.K.); arischuck@skku.edu (A.S.)

<sup>2</sup> Biomedical Engineering Research Center, Smart Healthcare Research Institute, Samsung Medical Center, Sungkyunkwan University School of Medicine, 06351, Seoul, Republic of Korea; juvenus369@naver.com

<sup>3</sup> Department of Medical Device Management and Research, Samsung Advanced Institute for Health Science & Technology, Sungkyunkwan University, 06351, Seoul, Republic of Korea

<sup>4</sup> Center for Infection Prevention and Control, Samsung Medical Center, 06351, Seoul, Republic of Korea; dr.chung@samsung.com

<sup>5</sup> Division of Infectious Diseases, Department of Internal Medicine, Samsung Medical Center, Sungkyunkwan University School of Medicine, 06351, Seoul, Republic of Korea

\* Correspondence: minhee.kang@samsung.com (M.K.); yongsang@skku.edu (Y.-S.K.)

| Target Region | Primer | Sequence                                              | Amplicon (bp) |
|---------------|--------|-------------------------------------------------------|---------------|
| E             | F3     | GCTGATGAGTACGAACTTATGTAC                              | 240           |
|               | B3     | CAGAAGATCAGGAACTCTAGAAGA                              |               |
|               | FIP    | AGGATGGCTAGTGTAAGTCAAGA-<br>GGAAGAGACAGGTACGTTAATAGTT |               |
|               | BIP    | GCGCTTCGATTGTGTGCGT-<br>CACGAGAGTAAACGTAAAAAGAAGG     |               |
|               | LF     | CGAAAGCAAGAAAAAGAAGTACGC                              |               |
|               | LB     | CTGCTGCAATATTGTAAACGTGAG                              |               |
| RdRP          | F3     | CTTGTTCTTGCTCGCAAACA                                  | 231           |
|               | B3     | ACCATCAGTAGATAAAAAGTGCA                               |               |
|               | FIP    | CGCCACACATGACCATTTCCTCA-<br>GTTGTAGCTTGTCACACCGTTTC   |               |
|               | BIP    | GGTGGAACCTCATCAGGAGATG-<br>TAACATTGGCCGTGACAG         |               |
|               | LF     | ACTTGAGCACACTCATTAGCTAATC                             |               |
|               | LB     | CCACAACCTGCTTATGCTAATAGTGT                            |               |

**Table S1:** Information on the Loop-Mediated Isothermal Amplification Primer Sets Used in the Assay. Primers were designed using Primer Explorer V5 software (<http://primerexplorer.jp/lampv5e/index.html>).

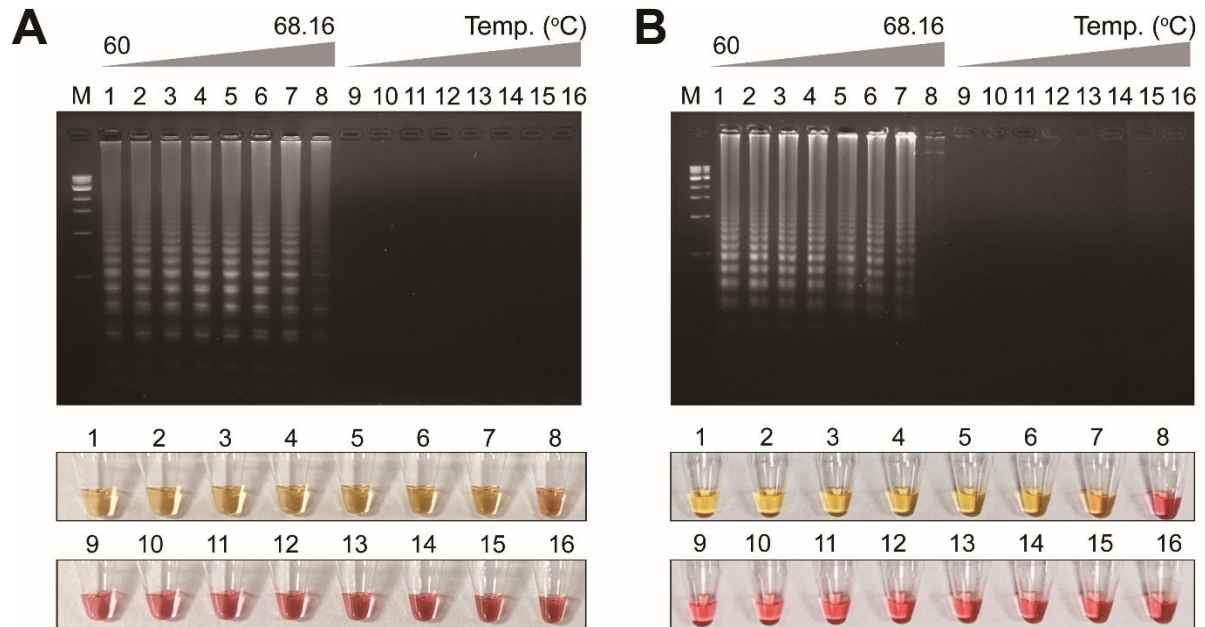

**Figure S1:** Agarose Electrophoresis Results and Naked-Eye Detection Following the Loop-Mediated Isothermal Amplification Assay. (A) E and (B) RdRP genes. Positive reactions display a distinct ladder of multiple bands in electrophoresis (lane M, 1 kb ladder; lanes 1-8, positive samples; lanes 9-16, non-template control; temperature gradient from 60-68.12 °C). In the colorimetric detection, orange signifies a positive reaction and neutral pink a negative reaction.

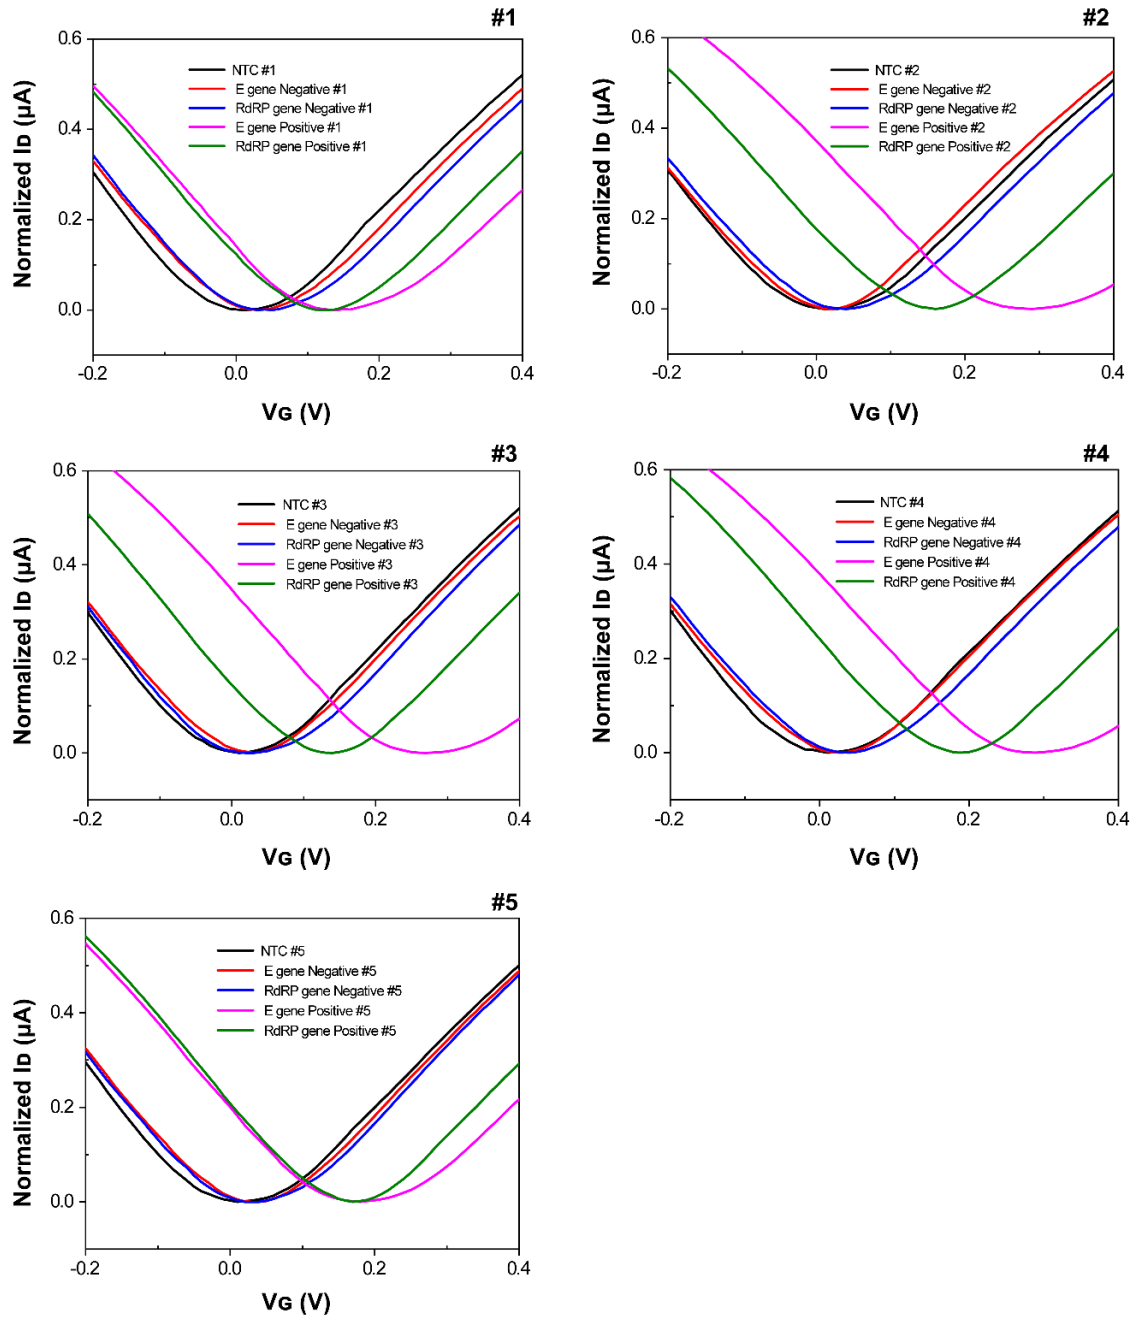

|               | $\Delta V_{\text{Dirac}}$ (V) |       |       |       |       |
|---------------|-------------------------------|-------|-------|-------|-------|
|               | 1                             | 2     | 3     | 4     | 5     |
| NTC           | 0.009                         | 0.005 | 0.004 | 0.008 | 0.003 |
| E gene (-)    | 0.020                         | 0.010 | 0.016 | 0.012 | 0.026 |
| RdRP gene (-) | 0.019                         | 0.024 | 0.017 | 0.027 | 0.020 |
| E gene (+)    | 0.149                         | 0.281 | 0.261 | 0.284 | 0.167 |
| RdRP gene (+) | 0.121                         | 0.162 | 0.146 | 0.188 | 0.167 |

NTC, non-template control;  $\Delta V_{\text{Dirac}}$ , shifts in the Dirac voltage.

**Figure S2:** Dirac voltage shift values for each clinical sample.
